# Supplementary material
Source: PubMed Central journal article supplement (PMC6909781)
Supplement: Supp_Data.pdf [file Supp_Data.pdf]

## **Supplemental Materials of**

### **Cross-species evidence of interplay between neural connectivity at the micro- and macroscale of connectome organization in human, mouse and rat brain**

#### **Authors**

Lianne H. Scholtens<sup>1</sup>, Lisa Feldman Barrett<sup>2,3,4</sup>, Martijn P. van den Heuvel<sup>1,5</sup>

#### **Affiliations**

1. Connectome Lab, Department of Complex Trait Genetics, Center for Neurogenomics and Cognitive Research, Amsterdam Neuroscience, Vrije Universiteit Amsterdam, Amsterdam, The Netherlands
2. Athinoula A. Martinos Center for Biomedical Imaging, Massachusetts General Hospital, Charlestown, Massachusetts
3. Department of Psychology, Northeastern University, Boston, Massachusetts
4. Psychiatric Neuroimaging Program, Department of Psychiatry, Massachusetts General Hospital, Charlestown, Massachusetts
5. Department of Clinical Genetics, Amsterdam Neuroscience, VU University Medical Center, Amsterdam, The Netherlands

#### **Address for Correspondence**

Martijn van den Heuvel, Connectome Lab, Department of Complex Trait Genetics, Center for Neurogenomics and Cognitive Research, Vrije Universiteit Amsterdam, De Boelelaan 1081-1087, 1081 HV, Amsterdam, Gebouw Wis- en Natuurkunde, Room: B-651, The Netherlands; Phone: +31205983343; Email: [martijn.vanden.heuvel@vu.nl](mailto:martijn.vanden.heuvel@vu.nl)

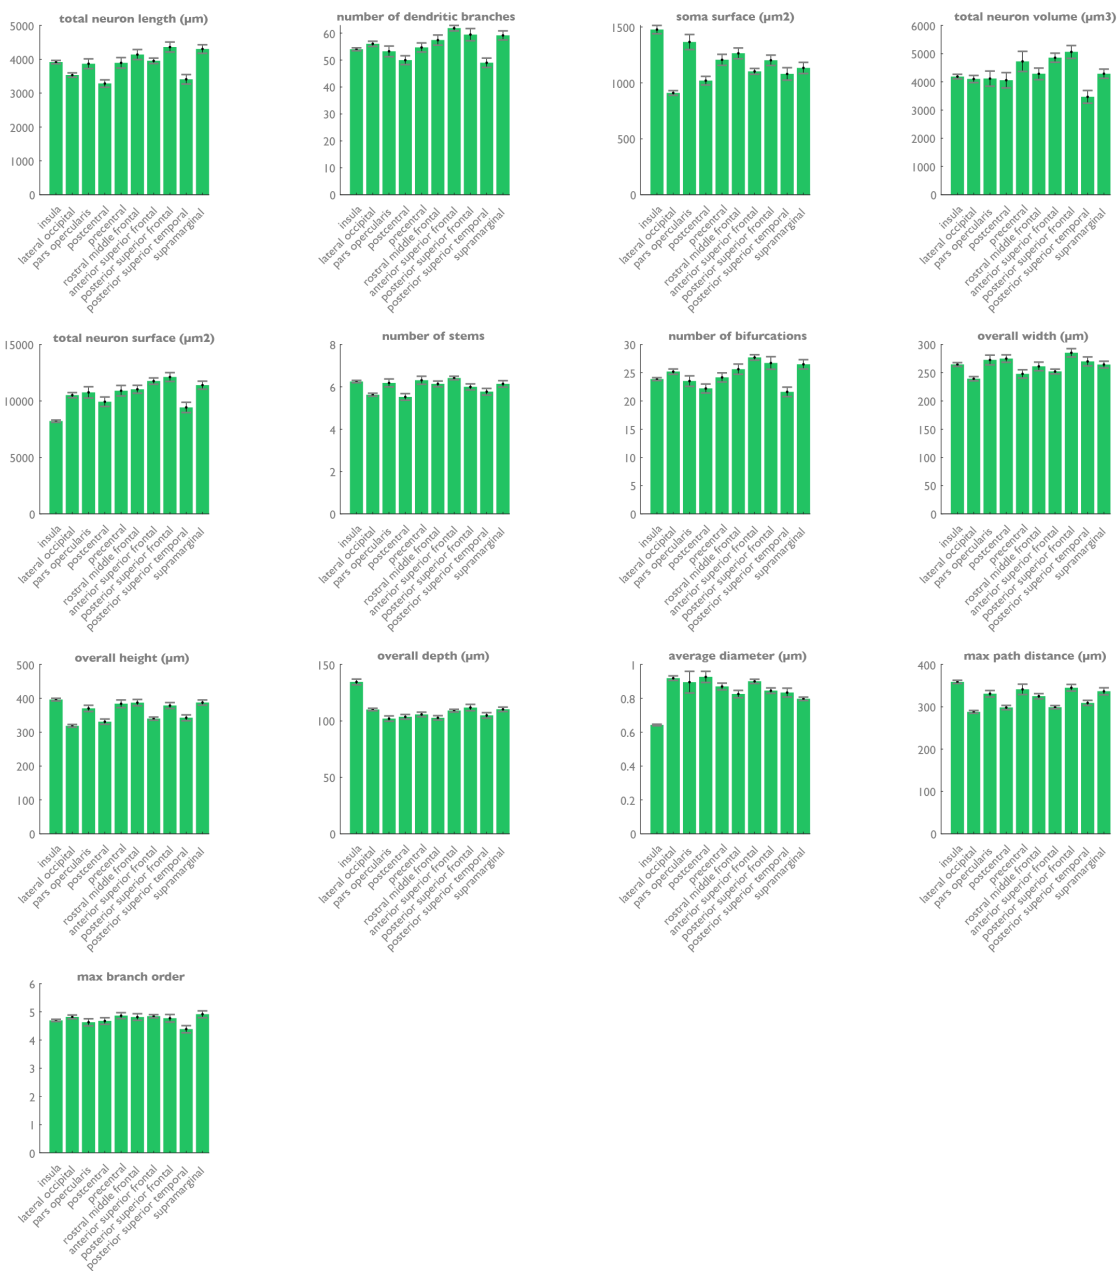

**Supplemental Figure S1. Human microscale data.** Summary statistics of microscale measures as extracted from NeuroMorpho.org for the human brain. Bar show region-wise mean for each measure; error bars show standard error.

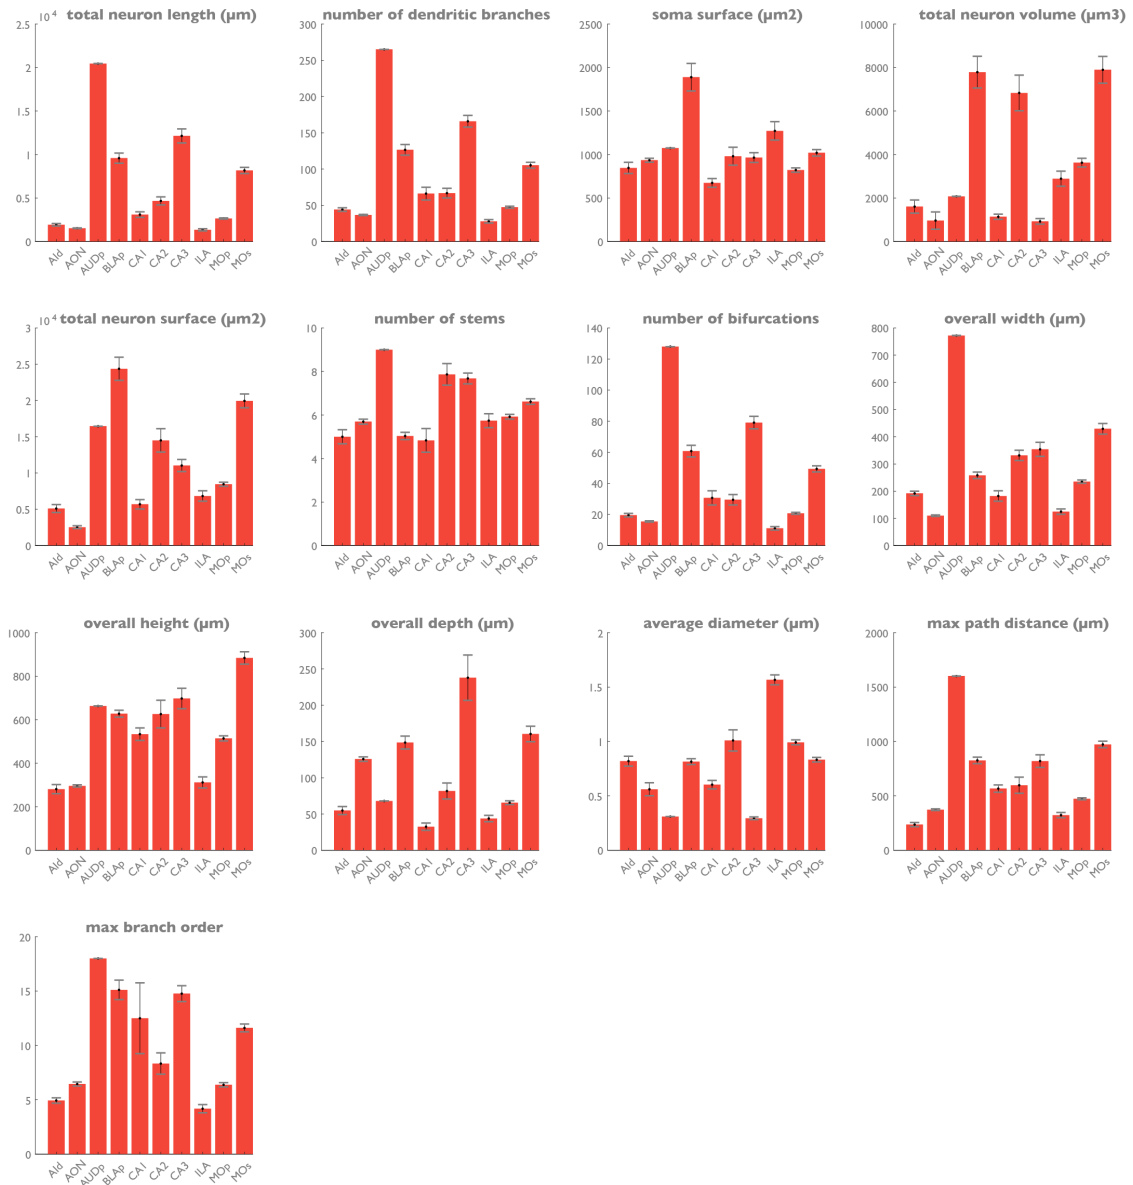

**Supplemental Figure S2. Rat microscale data.** Summary statistics of microscale measures as extracted from NeuroMorpho.org for the rat brain. Bar show region-wise mean for each measure; error bars show standard error.

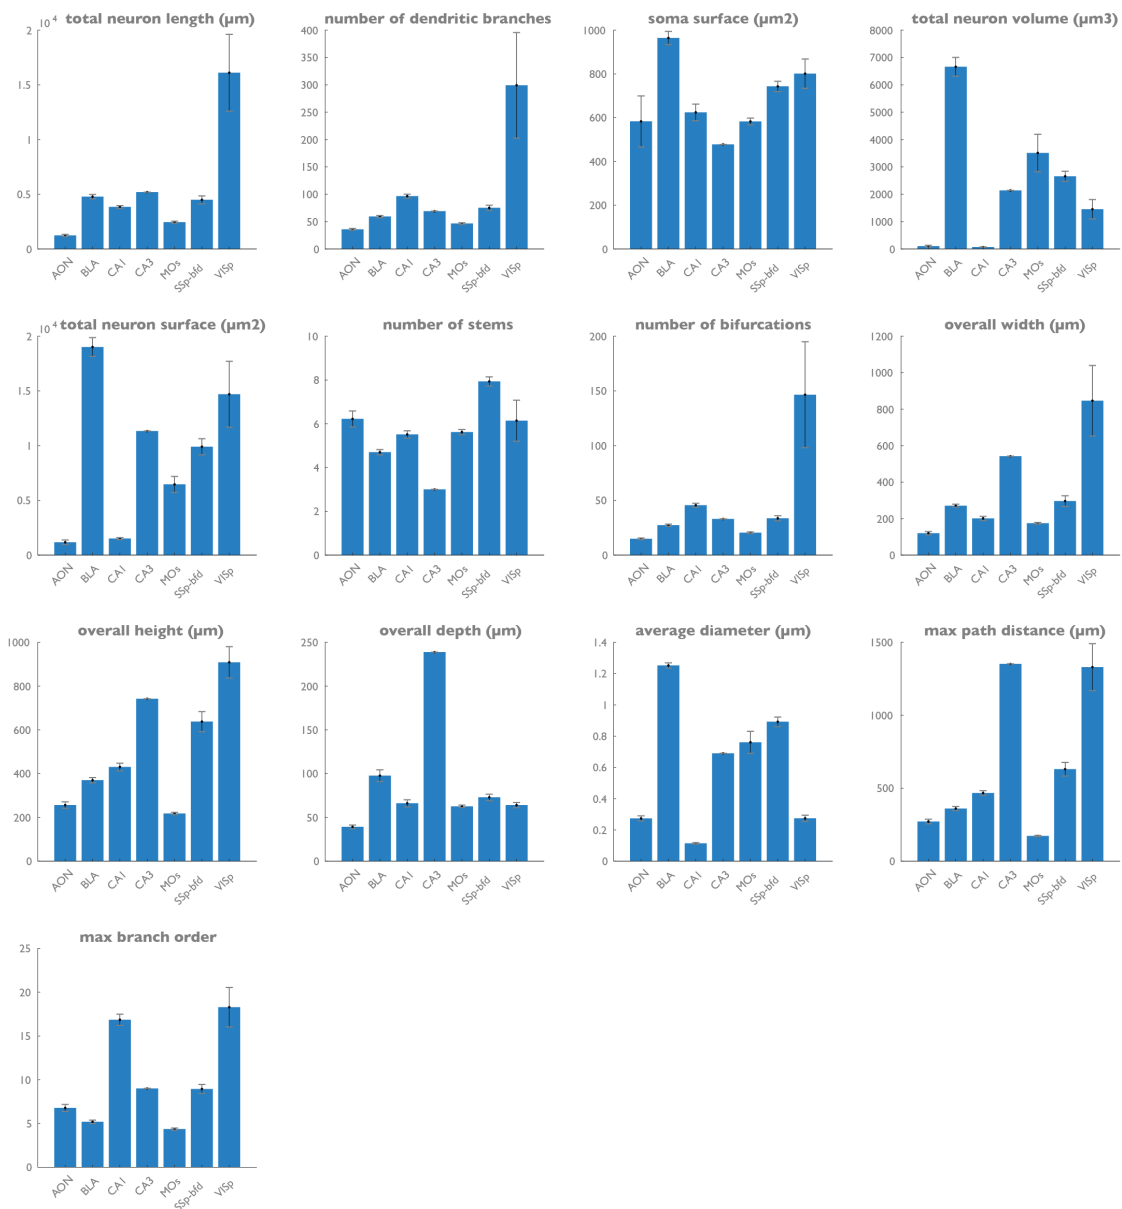

**Supplemental Figure S3. Mouse microscale data.** Summary statistics of microscale measures as extracted from NeuroMorpho.org for the mouse brain. Bar show region-wise mean for each measure; error bars show standard error.

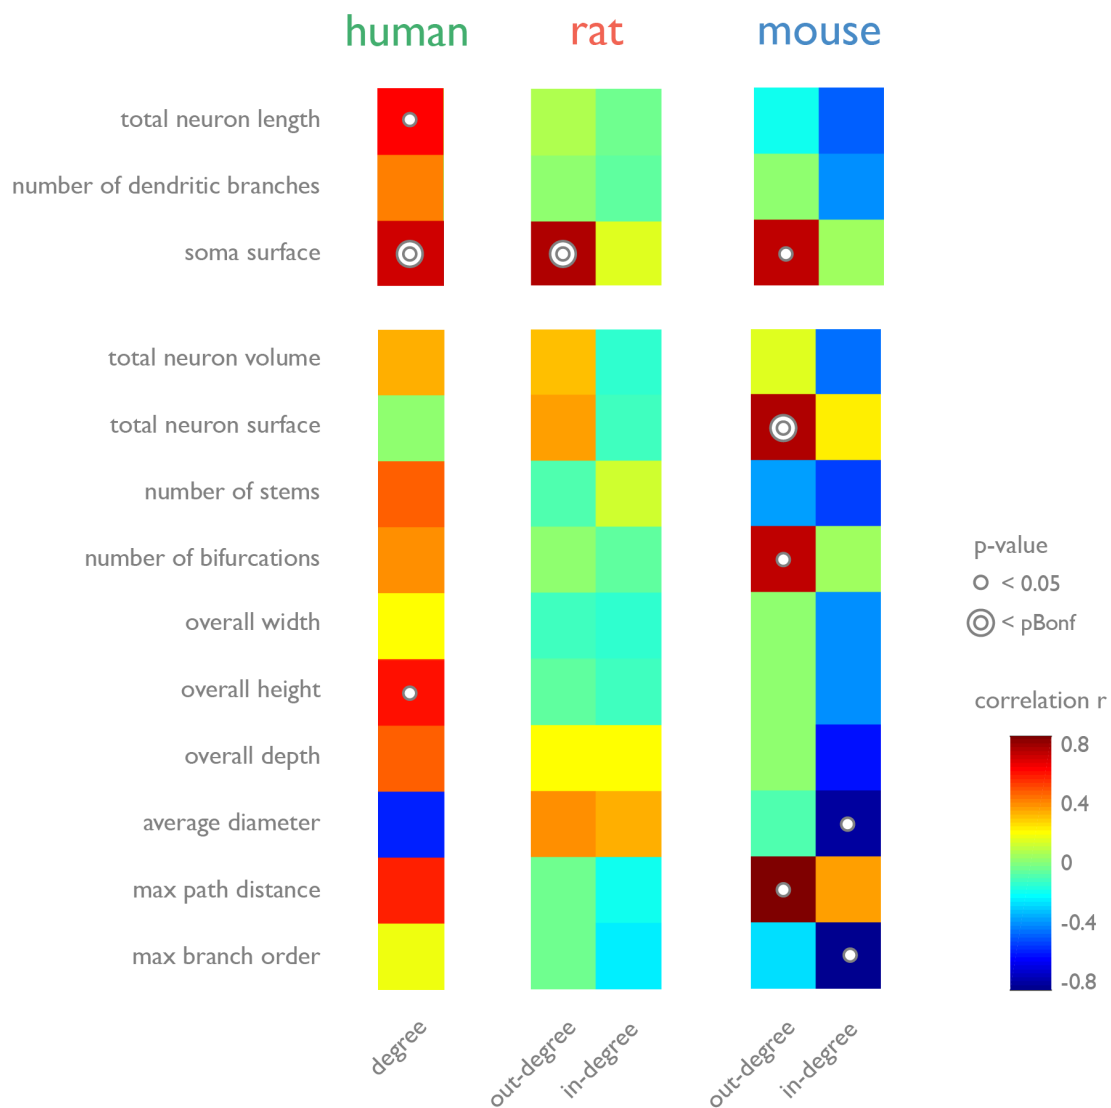

**Supplemental Figure S4. Microscale-macroscopic correlations between all metrics.** Figure shows color coded correlation values between microscale measures (rows) and macroscopic connectivity (columns) for human, rat and mouse. Single circles indicate correlations reaching an (uncorrected) p-value of  $p < 0.05$ , double circles indicate correlations reaching partial Bonferroni correction.

| <i>mapped Desikan -Killiany area</i> | <i>original area description</i>                                                          | <i>source publication</i>    |
|--------------------------------------|-------------------------------------------------------------------------------------------|------------------------------|
| <i>insula_1</i>                      | anterior long insular gyrus, middle short<br>insular gyrus, posterior short insular gyrus | Anderson (2009)              |
| <i>lateral occipital</i>             | Brodmann area 18                                                                          | Jacobs (1997)                |
| <i>pars opercularis</i>              | Brodmann area 44                                                                          | Jacobs (2001)                |
| <i>postcentral</i>                   | Brodmann area 3-1-2                                                                       | Jacobs (2001)                |
| <i>precentral</i>                    | Brodmann area 4                                                                           | Jacobs (2001)                |
| <i>rostral middle frontal</i>        | Brodmann area 11                                                                          | Jacobs (2001)                |
| <i>superior frontal 1</i>            | Brodmann area 10*                                                                         | Jacobs (1997), Jacobs (2001) |
| <i>superior frontal 2</i>            | Brodmann area 6                                                                           | Jacobs (2001)                |
| <i>superior temporal</i>             | Brodmann area 22                                                                          | Jacobs (2001)                |
| <i>supramarginal</i>                 | Brodmann area 39                                                                          | Jacobs (2001)                |

**Supplemental Table S1.** Regions as extracted from the NeuroMorpho.org database of the human brain mapped to regions of the DK-57 atlas. \*Described as area 10o of Öngür and Price (2000).

## References

- Anderson, K., Bones, B., Robinson, B., Hass, C., Lee, H., Ford, K., Roberts, T.A., Jacobs, B. (2009) The morphology of supragranular pyramidal neurons in the human insular cortex: a quantitative Golgi study. *Cerebral cortex* (New York, N.Y. : 1991), 19:2131-44.
- Jacobs, B., Driscoll, L., Schall, M. (1997) Life-span dendritic and spine changes in areas 10 and 18 of human cortex: a quantitative Golgi study. *The Journal of comparative neurology*, 386:661-80.
- Jacobs, B., Schall, M., Prather, M., Kapler, E., Driscoll, L., Baca, S., Jacobs, J., Ford, K., Wainwright, M., Treml, M. (2001) Regional Dendritic and Spine Variation in Human Cerebral Cortex: a Quantitative Golgi Study. *Cerebral Cortex*, 11:558-571.

| <i>BAMS-II area</i> | <i>original area</i>                 | <i>source publication</i>                                                                                                                                                                                                                                                                                                               |
|---------------------|--------------------------------------|-----------------------------------------------------------------------------------------------------------------------------------------------------------------------------------------------------------------------------------------------------------------------------------------------------------------------------------------|
| <i>AId</i>          | Rostral agranular insular cortex     | Brunjes (2010), Ehlinger (2012), Bergstrom (2008), Radman (2009)                                                                                                                                                                                                                                                                        |
| <i>AON</i>          | Pars principalis                     | Radman (2009), Brunjes (2010), Kole (2004), Carnevale (1997), Chitwood (1999), Meyer (2010), Bergstrom (2008), Ehlinger (2012),                                                                                                                                                                                                         |
| <i>AUDp</i>         | Primary auditory cortex              | Barbour (2008)                                                                                                                                                                                                                                                                                                                          |
| <i>CA1</i>          | CA1                                  | Kole (2004), Schubert (2006) Radman (2009), Brunjes (2010), Chitwood (1999), Carnevale (1997), Hay (2011), Ishizuka (1995), Wang (2002), Scorza (2011), Bergstrom (2008), Shepherd (2005), Bannister (1995), Pyapali (1994), Pyapali (1998), Brown (2005), Furtak (2007), Megias (2001), Marcelin (2012), Golding (2005), Bories (2013) |
| <i>CA2</i>          | CA2                                  | Scorza (2011)                                                                                                                                                                                                                                                                                                                           |
| <i>MOp</i>          | Precentral gyrus                     | Kole (2004), Radman (2009), Schubert (2006), Brunjes (2010)                                                                                                                                                                                                                                                                             |
| <i>MOs</i>          | Secondary motor cortex               | Henze (1996), Ueta (2014), Hirai (2012)                                                                                                                                                                                                                                                                                                 |
| <i>peri</i>         | Perirhinal                           | Furtak (2007), Bergstrom (2008)                                                                                                                                                                                                                                                                                                         |
| <i>PL</i>           | Prelimbic                            | Schubert (2006), Bergstrom (2008), Ehlinger (2012), Brunjes (2010), Ishizuka (1995), Staiger (2004), Shepherd (2005), Bannister (1995), Steger (2013), Turner (1995), Pyapali (1996), Furtak (2007), Bar-Yehuda (2008), Zheng (2012), Marcelin (2012), Scorcioni (2005), Karagiannis (2009), Bories (2013)                              |
| <i>SSp</i>          | Primary somatosensory; Barrel cortex | Kole (2004), Bergstrom (2008), Schubert (2006), Radman (2009), Helmstaedter (2009), Meyer (2010), Karagiannis (2009), Steger (2013), Marx (2013), Wang (2002), Hay (2011), Ishizuka (1995), Staiger (2004), Hirai (2012), Bar-Yehuda (2008)                                                                                             |

**Supplemental Table S2.** Regions as extracted from the NeuroMorpho.org database of the rat brain mapped to regions of Swanson's rat brain atlas as used in BAMS-II (Bota, et al., 2015).

## References

- Bannister, N.J., Larkman, A.U. (1995) Dendritic morphology of CA1 pyramidal neurones from the rat hippocampus: I. Branching patterns. *The Journal of comparative neurology*, 360:150-60.
- Bar-Yehuda, D., Korngreen, A. (2008) Space-clamp problems when voltage clamping neurons expressing voltage-gated conductances. *J Neurophysiol*, 99:1127-36.

- Barbour, D.L., Callaway, E.M. (2008) Excitatory local connections of superficial neurons in rat auditory cortex. *The Journal of neuroscience : the official journal of the Society for Neuroscience*, 28:11174-85.
- Bergstrom, H.C., McDonald, C.G., French, H.T., Smith, R.F. (2008) Continuous nicotine administration produces selective, age-dependent structural alteration of pyramidal neurons from prelimbic cortex. *Synapse (New York, N.Y.)*, 62:31-9.
- Bories, C., Husson, Z., Guitton, M.J., De Koninck, Y. (2013) Differential balance of prefrontal synaptic activity in successful versus unsuccessful cognitive aging. *The Journal of neuroscience : the official journal of the Society for Neuroscience*, 33:1344-56.
- Brown, K.M., Donohue, D.E., D'Alessandro, G., Ascoli, G.A. (2005) A cross-platform freeware tool for digital reconstruction of neuronal arborizations from image stacks. *Neuroinformatics*, 3:343-60.
- Brunjes, P.C., Kenerson, M.C. (2010) The anterior olfactory nucleus: quantitative study of dendritic morphology. *The Journal of comparative neurology*, 518:1603-16.
- Carnevale, N.T., Tsai, K.Y., Claiborne, B.J., Brown, T.H. (1997) Comparative electrotonic analysis of three classes of rat hippocampal neurons. *J Neurophysiol*, 78:703-20.
- Chitwood, R.A., Hubbard, A., Jaffe, D.B. (1999) Passive electrotonic properties of rat hippocampal CA3 interneurons. *The Journal of physiology*, 515 ( Pt 3):743-56.
- Ehlinger, D.G., Bergstrom, H.C., McDonald, C.G., Smith, R.F. (2012) Nicotine-induced dendritic remodeling in the insular cortex. *Neurosci Lett*, 516:89-93.
- Furtak, S.C., Moyer, J.R., Jr., Brown, T.H. (2007) Morphology and ontogeny of rat perirhinal cortical neurons. *The Journal of comparative neurology*, 505:493-510.
- Golding, N.L., Mickus, T.J., Katz, Y., Kath, W.L., Spruston, N. (2005) Factors mediating powerful voltage attenuation along CA1 pyramidal neuron dendrites. *The Journal of physiology*, 568:69-82.
- Hay, E., Hill, S., Schurmann, F., Markram, H., Segev, I. (2011) Models of neocortical layer 5b pyramidal cells capturing a wide range of dendritic and perisomatic active properties. *PLoS Comput Biol*, 7:e1002107.
- Helmstaedter, M., Sakmann, B., Feldmeyer, D. (2009) The relation between dendritic geometry, electrical excitability, and axonal projections of L2/3 interneurons in rat barrel cortex. *Cerebral cortex (New York, N.Y. : 1991)*, 19:938-50.
- Henze, D.A., Cameron, W.E., Barrionuevo, G. (1996) Dendritic morphology and its effects on the amplitude and rise-time of synaptic signals in hippocampal CA3 pyramidal cells. *The Journal of comparative neurology*, 369:331-44.



- Hirai, Y., Morishima, M., Karube, F., Kawaguchi, Y. (2012) Specialized cortical subnetworks differentially connect frontal cortex to parahippocampal areas. *The Journal of neuroscience : the official journal of the Society for Neuroscience*, 32:1898-913.
- Ishizuka, N., Cowan, W.M., Amaral, D.G. (1995) A quantitative analysis of the dendritic organization of pyramidal cells in the rat hippocampus. *The Journal of comparative neurology*, 362:17-45.
- Karagiannis, A., Gallopin, T., David, C., Battaglia, D., Geoffroy, H., Rossier, J., Hillman, E.M., Staiger, J.F., Cauli, B. (2009) Classification of NPY-expressing neocortical interneurons. *The Journal of neuroscience : the official journal of the Society for Neuroscience*, 29:3642-59.
- Kole, M.H., Costoli, T., Koolhaas, J.M., Fuchs, E. (2004) Bidirectional shift in the cornu ammonis 3 pyramidal dendritic organization following brief stress. *Neuroscience*, 125:337-47.
- Marcelin, B., Liu, Z., Chen, Y., Lewis, A.S., Becker, A., McClelland, S., Chetkovich, D.M., Migliore, M., Baram, T.Z., Esclapez, M., Bernard, C. (2012) Dorsoventral differences in intrinsic properties in developing CA1 pyramidal cells. *The Journal of neuroscience : the official journal of the Society for Neuroscience*, 32:3736-47.
- Marx, M., Feldmeyer, D. (2013) Morphology and physiology of excitatory neurons in layer 6b of the somatosensory rat barrel cortex. *Cerebral cortex (New York, N.Y. : 1991)*, 23:2803-17.
- Megias, M., Emri, Z., Freund, T.F., Gulyas, A.I. (2001) Total number and distribution of inhibitory and excitatory synapses on hippocampal CA1 pyramidal cells. *Neuroscience*, 102:527-40.
- Meyer, H.S., Wimmer, V.C., Hemberger, M., Bruno, R.M., de Kock, C.P., Frick, A., Sakmann, B., Helmstaedter, M. (2010) Cell type-specific thalamic innervation in a column of rat vibrissal cortex. *Cerebral cortex (New York, N.Y. : 1991)*, 20:2287-303.
- Pyapali, G.K., Sik, A., Penttonen, M., Buzsaki, G., Turner, D.A. (1998) Dendritic properties of hippocampal CA1 pyramidal neurons in the rat: intracellular staining in vivo and in vitro. *The Journal of comparative neurology*, 391:335-52.
- Pyapali, G.K., Turner, D.A. (1994) Denervation-induced dendritic alterations in CA1 pyramidal cells following kainic acid hippocampal lesions in rats. *Brain research*, 652:279-90.
- Pyapali, G.K., Turner, D.A. (1996) Increased dendritic extent in hippocampal CA1 neurons from aged F344 rats. *Neurobiol Aging*, 17:601-11.
- Radman, T., Ramos, R.L., Brumberg, J.C., Bikson, M. (2009) Role of cortical cell type and morphology in subthreshold and suprathreshold uniform electric field stimulation in vitro. *Brain stimulation*, 2:215-28, 228.e1-3.

- Schubert, D., Kötter, R., Luhmann, H.J., Staiger, J.F. (2006) Morphology, Electrophysiology and Functional Input Connectivity of Pyramidal Neurons Characterizes a Genuine Layer Va in the Primary Somatosensory Cortex. *Cerebral Cortex*, 16:223-236.
- Scorcioni, R., Ascoli, G.A. (2005) Algorithmic reconstruction of complete axonal arborizations in rat hippocampal neurons. *Neurocomputing*, 65–66:15-22.
- Scorza, C.A., Araujo, B.H., Leite, L.A., Torres, L.B., Otalora, L.F., Oliveira, M.S., Garrido-Sanabria, E.R., Cavalheiro, E.A. (2011) Morphological and electrophysiological properties of pyramidal-like neurons in the stratum oriens of Cornu ammonis 1 and Cornu ammonis 2 area of *Proechimys*. *Neuroscience*, 177:252-68.
- Shepherd, G.M., Svoboda, K. (2005) Laminar and columnar organization of ascending excitatory projections to layer 2/3 pyramidal neurons in rat barrel cortex. *The Journal of neuroscience : the official journal of the Society for Neuroscience*, 25:5670-9.
- Staiger, J.F., Flaggmeyer, I., Schubert, D., Zilles, K., Kötter, R., Luhmann, H.J. (2004) Functional diversity of layer IV spiny neurons in rat somatosensory cortex: quantitative morphology of electrophysiologically characterized and biocytin labeled cells. *Cerebral cortex (New York, N.Y. : 1991)*, 14:690-701.
- Steger, R.M., Ramos, R.L., Cao, R., Yang, Q., Chen, C.C., Dominici, J., Brumberg, J.C. (2013) Physiology and morphology of inverted pyramidal neurons in the rodent neocortex. *Neuroscience*, 248:165-79.
- Turner, D.A., Li, X.G., Pyapali, G.K., Ylinen, A., Buzsaki, G. (1995) Morphometric and electrical properties of reconstructed hippocampal CA3 neurons recorded in vivo. *The Journal of comparative neurology*, 356:580-94.
- Ueta, Y., Otsuka, T., Morishima, M., Ushimaru, M., Kawaguchi, Y. (2014) Multiple layer 5 pyramidal cell subtypes relay cortical feedback from secondary to primary motor areas in rats. *Cerebral cortex (New York, N.Y. : 1991)*, 24:2362-76.
- Wang, Y., Gupta, A., Toledo-Rodriguez, M., Wu, C.Z., Markram, H. (2002) Anatomical, physiological, molecular and circuit properties of nest basket cells in the developing somatosensory cortex. *Cerebral cortex (New York, N.Y. : 1991)*, 12:395-410.
- Zheng, W., Geng, A.Q., Li, P.F., Wang, Y., Yuan, X.B. (2012) Robo4 regulates the radial migration of newborn neurons in developing neocortex. *Cerebral cortex (New York, N.Y. : 1991)*, 22:2587-601.

| <i>mapped Allen Mouse Brain Atlas area</i> | <i>original area</i>         | <i>source publication</i>                |
|--------------------------------------------|------------------------------|------------------------------------------|
| <i>AON</i>                                 | anterior olfactory nucleus   | Brunjes (2011)                           |
| <i>BLA</i>                                 | basolateral amygdala complex | Carim-Todd (2009)                        |
| <i>CA1</i>                                 | CA1                          | Michaelsen (2010), Beguin (2013)         |
| <i>CA3</i>                                 | CA3                          | Heistek (2013)                           |
| <i>MOs</i>                                 | secondary motor cortex       | Ballesteros-Yáñez (2007)                 |
| <i>SSp-bfd</i>                             | barrel cortex                | Krieger (2007), Groh (2010), Chen (2009) |
| <i>VISp</i>                                | visual                       | Tsay (2002)                              |

**Supplemental Table S3.** Regions as extracted from the NeuroMorpho.org database of the mouse brain mapped to regions of the Allen Mouse Brain Atlas as presented in (Oh, et al., 2014).

## References

- Ballesteros-Yanez, I., Valverde, O., Ledent, C., Maldonado, R., DeFelipe, J. (2007) Chronic cocaine treatment alters dendritic arborization in the adult motor cortex through a CB1 cannabinoid receptor-dependent mechanism. *Neuroscience*, 146:1536-45.
- Beguin, S., Crepel, V., Aniksztejn, L., Becq, H., Pelosi, B., Palesi-Pocachard, E., Bouamrane, L., Pasqualetti, M., Kitamura, K., Cardoso, C., Represa, A. (2013) An epilepsy-related ARX polyalanine expansion modifies glutamatergic neurons excitability and morphology without affecting GABAergic neurons development. *Cerebral cortex (New York, N.Y. : 1991)*, 23:1484-94.
- Brunjes, P.C., Kay, R.B., Arrivillaga, J.P. (2011) The mouse olfactory peduncle. *The Journal of comparative neurology*, 519:2870-86.
- Carim-Todd, L., Bath, K.G., Fulgenzi, G., Yanpallewar, S., Jing, D., Barrick, C.A., Becker, J., Buckley, H., Dorsey, S.G., Lee, F.S., Tessarollo, L. (2009) Endogenous truncated TrkB.T1 receptor regulates neuronal complexity and TrkB kinase receptor function in vivo. *The Journal of neuroscience : the official journal of the Society for Neuroscience*, 29:678-85.
- Chen, C.C., Abrams, S., Pinhas, A., Brumberg, J.C. (2009) Morphological heterogeneity of layer VI neurons in mouse barrel cortex. *The Journal of comparative neurology*, 512:726-46.
- Groh, A., Meyer, H.S., Schmidt, E.F., Heintz, N., Sakmann, B., Krieger, P. (2010) Cell-type specific properties of pyramidal neurons in neocortex underlying a layout that is modifiable depending on the cortical area. *Cerebral cortex (New York, N.Y. : 1991)*, 20:826-36.

- Heistek, T.S., Ruiperez-Alonso, M., Timmerman, A.J., Brussaard, A.B., Mansvelder, H.D. (2013) alpha2-containing GABAA receptors expressed in hippocampal region CA3 control fast network oscillations. *The Journal of physiology*, 591:845-58.
- Krieger, P., Kuner, T., Sakmann, B. (2007) Synaptic connections between layer 5B pyramidal neurons in mouse somatosensory cortex are independent of apical dendrite bundling. *The Journal of neuroscience : the official journal of the Society for Neuroscience*, 27:11473-82.
- Michaelsen, K., Murk, K., Zagrebelsky, M., Dreznjak, A., Jockusch, B.M., Rothkegel, M., Korte, M. (2010) Fine-tuning of neuronal architecture requires two profilin isoforms. *Proceedings of the National Academy of Sciences of the United States of America*, 107:15780-5.
- Tsay, D., Yuste, R. (2002) Role of dendritic spines in action potential backpropagation: a numerical simulation study. *J Neurophysiol*, 88:2834-45.
